# Supplementary material for: Interactions with a Complex Microbiota Mediate a Trade-Off between the Host Development Rate and Heat Stress Resistance
Source: MDPI journal article supplement (doi:10.3390/microorganisms8111781), 2020-11-13
Supplement: s1 [file s1]

**Table S1. Complex soil microbiotas accelerate host development.**

| Experiment | Time to 50% adults (hrs) <i>E. coli</i> <sup>a</sup> | Time to 50% adults (hrs) native microbiota <sup>b</sup> | Difference (hrs) <sup>d</sup> | <sup>c</sup> <i>P</i> -value |
|------------|------------------------------------------------------|---------------------------------------------------------|-------------------------------|------------------------------|
| 1          | 40.8                                                 | 34.4                                                    | 6.4                           | <0.001                       |
| 2          | 39.8                                                 | 38.5                                                    | 1.3                           | 0.028                        |
| 3          | 43.8                                                 | 37.4                                                    | 6.4                           | 0.003                        |

<sup>a,b</sup> Worms were raised in compost microcosms, or on autoclaved microcosms supplemented with *E. coli* alone (20°C).

<sup>c</sup> *P*-values designate statistical significance between development curves (binomial logistic regression analyses).

<sup>d</sup> On average, worm populations reached 50% adult 4.8 hours earlier when raised on complex microbiotas. Experiment 1 data previously shown (Figure 1C)

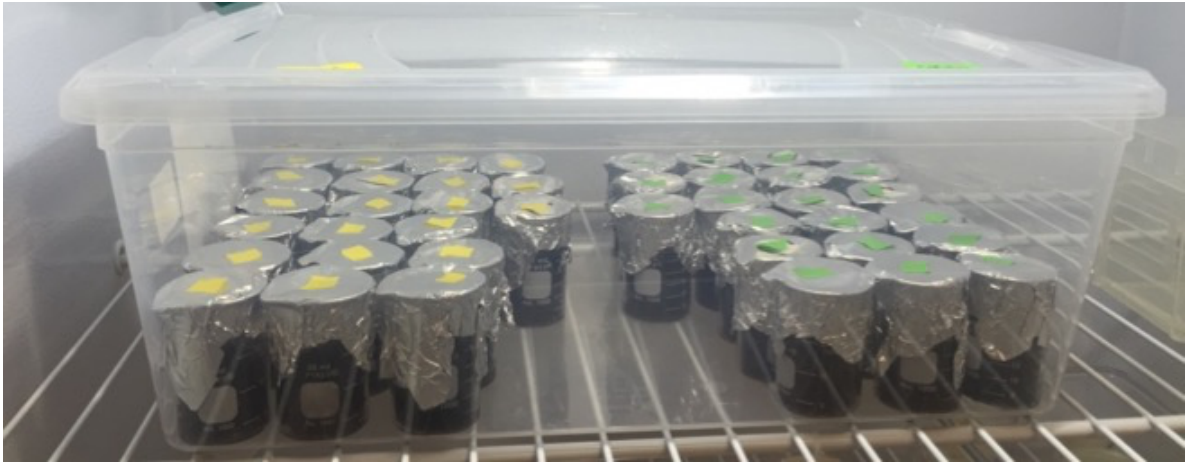

**Figure S1. Experimental microcosms in 20 mL glass vials.**

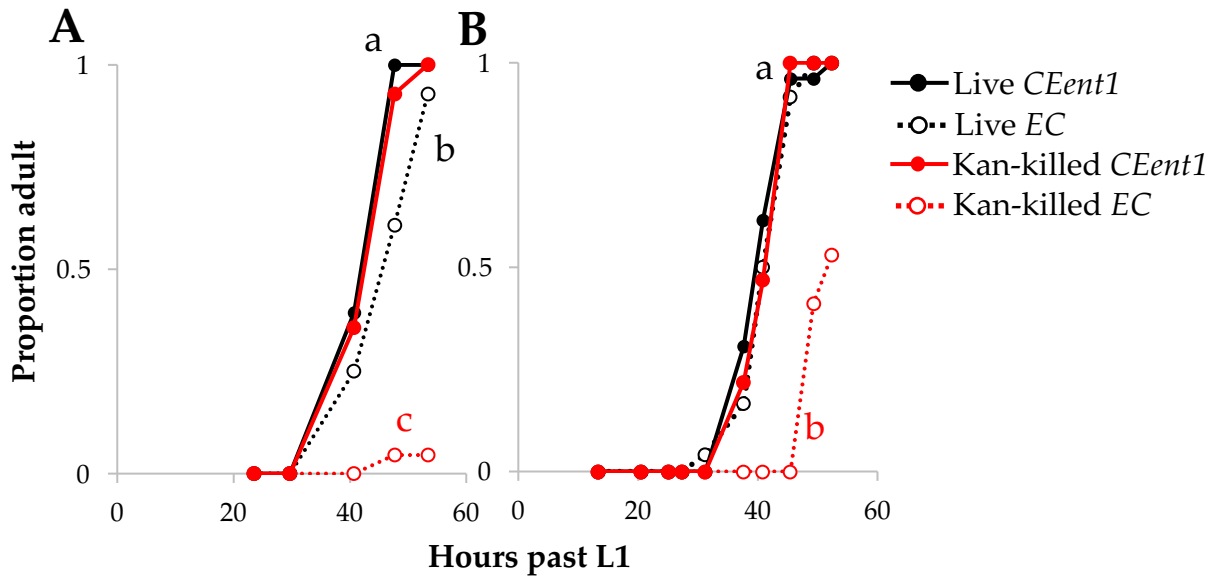

**Figure S2. Kanamycin treatment of *E. coli* and *Enterobacter hormaechei* *CEent1* differentially affects *C. elegans* development.** Development rate of wildtype worms raised on designated bacterial strains in two additional experiments (A, B) to the one presented in Fig. 1 (20 °C). Letters adjacent to curves indicate statistically distinct classes (Kaplan-Meier analyses, post-hoc p-value < 0.002).
